# Supplementary material for: Training Methods of Multi-Label Prediction Classifiers for Hyperspectral Remote Sensing Images
Source: MDPI journal article supplement (doi:10.3390/rs15245656), 2023-12-07
Supplement: s1 [file s1]

Archive with 1 entries (1 files):
- remotesensing-2706938-supplementary.pdf
